# Supplementary material for: Detection of carbohydrates using surface-assisted laser desorption/ionization mass spectrometry with HgTe nanostructures
Source: Royal Society of Chemistry journal article supplement (doi:10.1039/c2sc01066f), 2012-01-01
Supplement: c2sc01066f.pdf [file c2sc01066f.pdf]

*Supporting information*

**Detection of saccharides using HgTe nanostructures in  
surface-assisted laser desorption/ionization mass spectrometry**

Ming-Feng Huang and Huan-Tsung Chang\*

Department of Chemistry, National Taiwan University, 1, Section 4, Roosevelt Road,

Taipei 106, Taiwan,

**Correspondence:** Professor Huan-Tsung Chang, Department of Chemistry, National

Taiwan University, 1, Section 4, Roosevelt Road, Taipei 106, Taiwan

Tel/Fax: 011-886-2-33661171.

E-mail: changht@ntu.edu.tw.

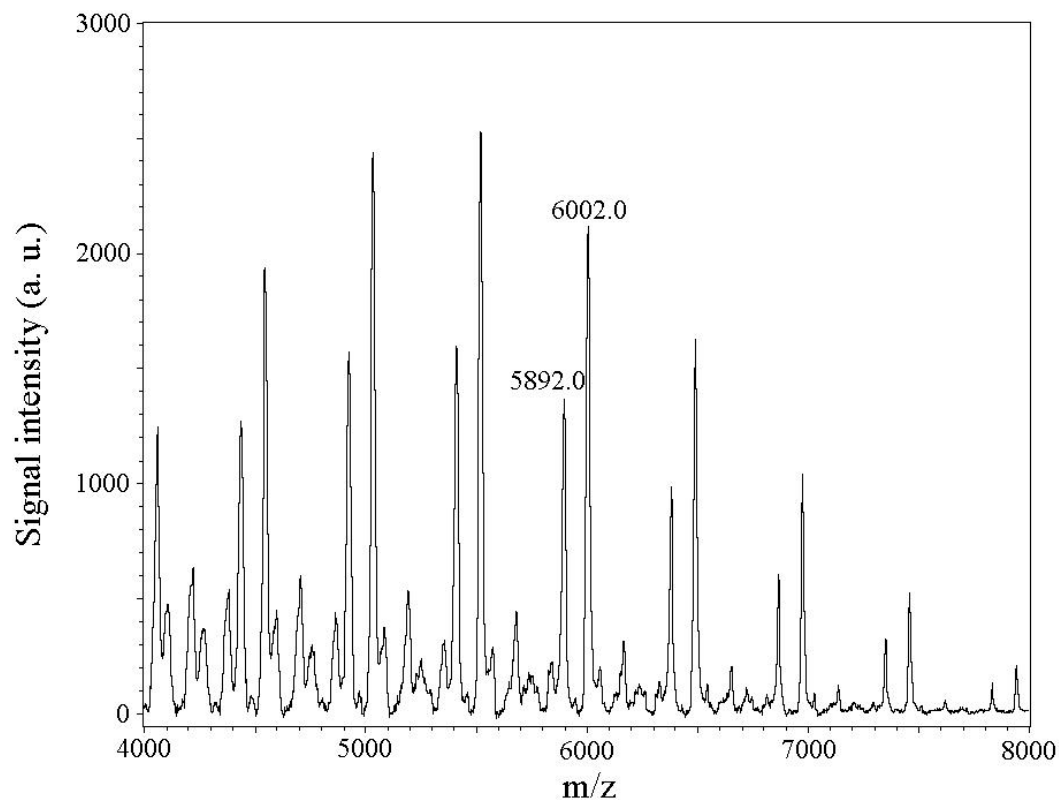

**Figure S1.** SALDI mass spectrum of PL-6k performed in conjunction with HgTe nanostructures. The concentrations of PL-6k was 10  $\mu\text{M}$ . HgTe nanostructures (1 $\times$ ) were prepared in ammonium citrate solution (0.5 mM, pH 7.0) containing 0.1 mM NaCl and 0.1 mM CsCl. The signals at  $m/z$  5892.0, and 6002.0 represent the sodium adduct  $[\text{PL-6k} + \text{Na}]^+$  and cesium adduct  $[\text{PL-6k} + \text{Cs}]^+$ , respectively. A total of 300 pulsed laser shots were applied under a laser fluence of 75  $\mu\text{J}$  (power density:  $2.5 \times 10^9 \text{ W cm}^{-2}$ ).

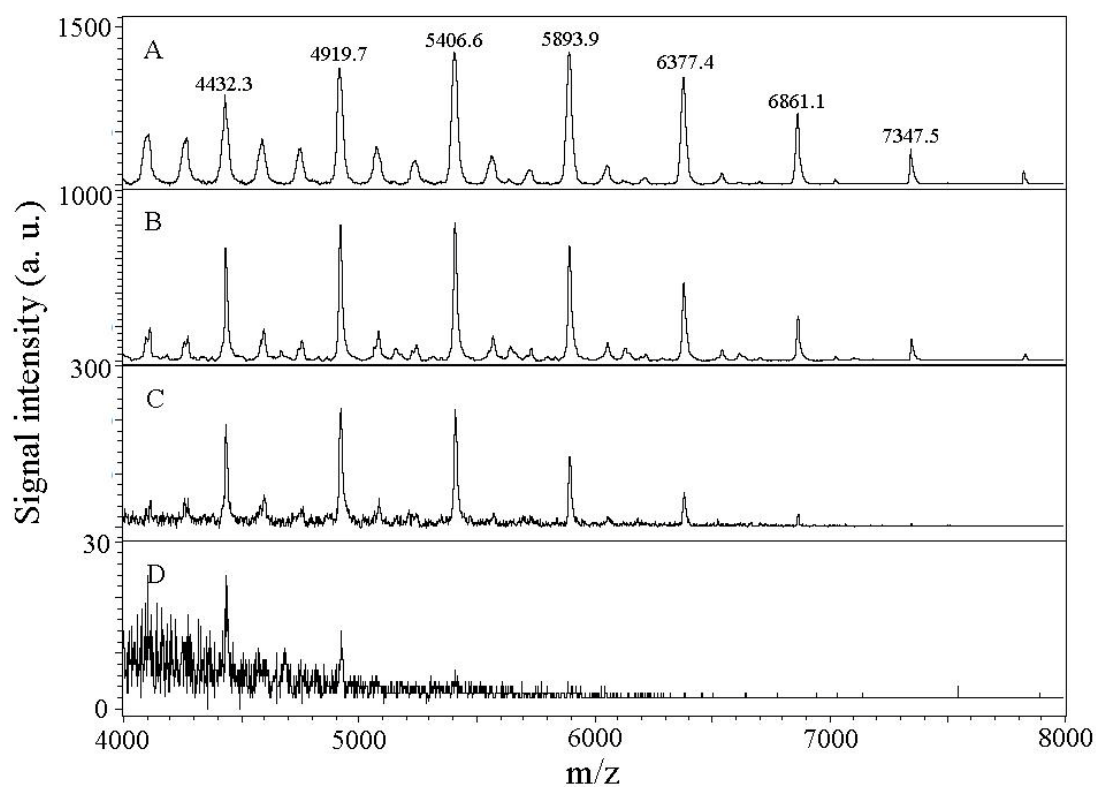

**Figure S2.** SALDI mass spectra of PL-6k performed in conjunction with HgTe nanostructures. The concentrations of PL-6k were (A) 10  $\mu\text{M}$ ; (B) 1  $\mu\text{M}$ ; (C) 100 nM and (D) 10 nM. HgTe nanostructures (1 $\times$ ) were prepared in ammonium citrate (0.5 mM, pH 7.0) containing 0.1 mM NaCl. 300-Pulsed laser shots were applied under a laser fluence of 75  $\mu\text{J}$ .

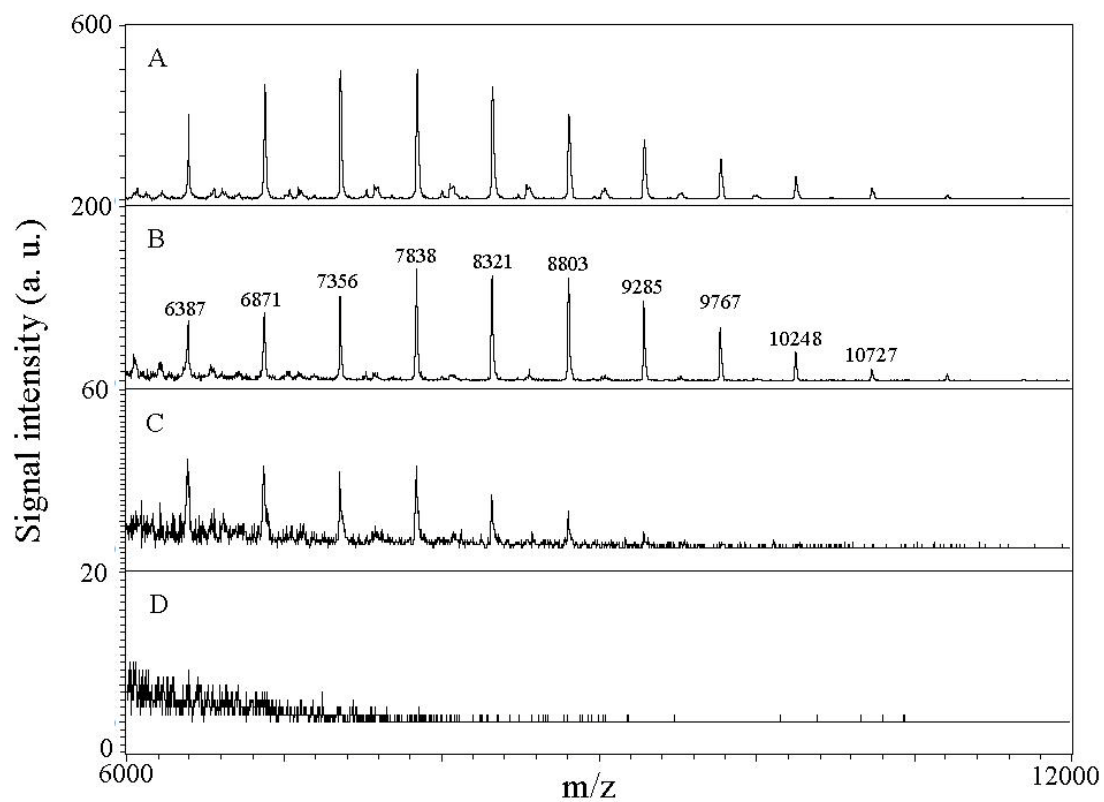

**Figure S3.** SALDI mass spectra of PL-10k performed in conjunction with HgTe nanostructures. The concentrations of PL-10k were (A) 10  $\mu\text{M}$ ; (B) 1  $\mu\text{M}$ ; (C) 100 nM and (D) 10 nM. HgTe nanostructures (3 $\times$ ) were prepared in ammonium citrate solution (50 mM, pH 9.0). 300-Pulsed laser shots were applied under a laser fluence of 120  $\mu\text{J}$ .
